# Supplementary material for: Quality-by-design-engineered mitochondrial targeted nanoparticles for glioblastoma therapy
Source: RSC Adv. 2024 Oct 28;14(46):34100–18. doi: 10.1039/d4ra04748f (PMC11513785; doi:10.1039/d4ra04748f)
Supplement: RA-014-D4RA04748F-s001 [file RA-014-D4RA04748F-s001.pdf]

## **Quality-by-Design-engineered mitochondrial targeted nanoparticles for glioblastoma therapy**

**Akanksha Dahifale<sup>a#</sup>, Tejas Girish Agnihotri<sup>a#</sup>, Ankit Jain<sup>\*b</sup>, Aakanchha Jain<sup>\*a</sup>**

<sup>a</sup>Department of Pharmaceutics, National Institute of Pharmaceutical Education and Research (NIPER)-Ahmedabad, Palaj, Gandhinagar-382355, Gujarat, India

<sup>b</sup>Department of Pharmacy, Birla Institute of Technology & Science, Pilani-333031, Rajasthan, India

# These authors contributed equally

### **\*Corresponding authors**

Dr. Aakanchha Jain ([jainaakanchha83@gmail.com](mailto:jainaakanchha83@gmail.com); [aakanchha.jain@niperahm.res.in](mailto:aakanchha.jain@niperahm.res.in))

[Dr. Ankit Jain \(ankit.j@pilani.bits-pilani@ac.in\)](mailto:Dr. Ankit Jain (ankit.j@pilani.bits-pilani@ac.in))

## Supplementary Figures:

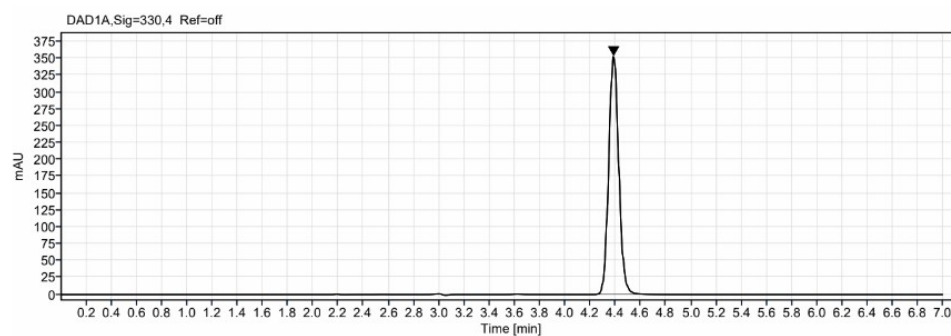

**Fig. S1(a)** HPLC chromatogram of Temozolomide (TMZ) with detection wavelength at 330 nm and retention time of 4.3 min and run time of 7 min

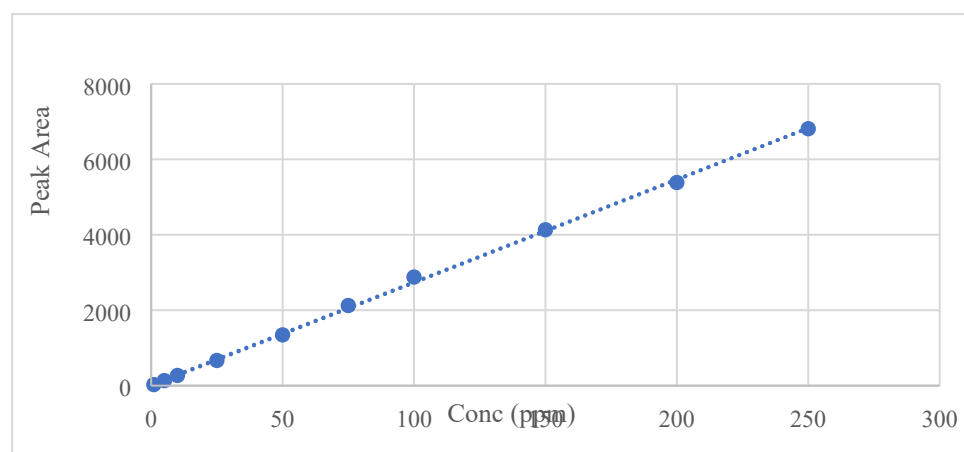

**Fig. S1(b)** Calibration curve and regression equation of TMZ in Milli-Q water with linearity ranging from 1  $\mu\text{g/mL}$  to 250  $\mu\text{g/mL}$  and  $R^2$  value of 0.9993

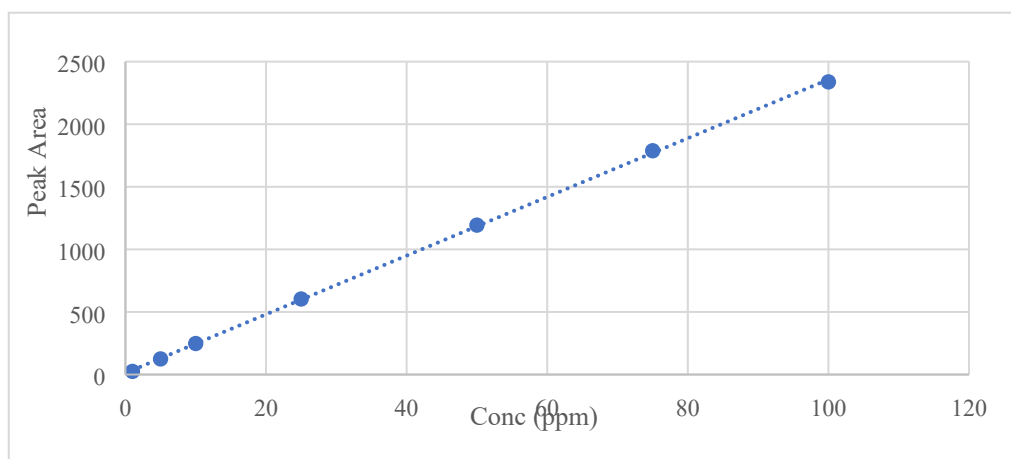

**Fig. S1(c)** Calibration curve and regression equation of TMZ in Phosphate Buffer Saline (PBS; pH 5) with linearity ranging from 1  $\mu\text{g/mL}$  to 100  $\mu\text{g/mL}$  and  $R^2$  value of 0.9998

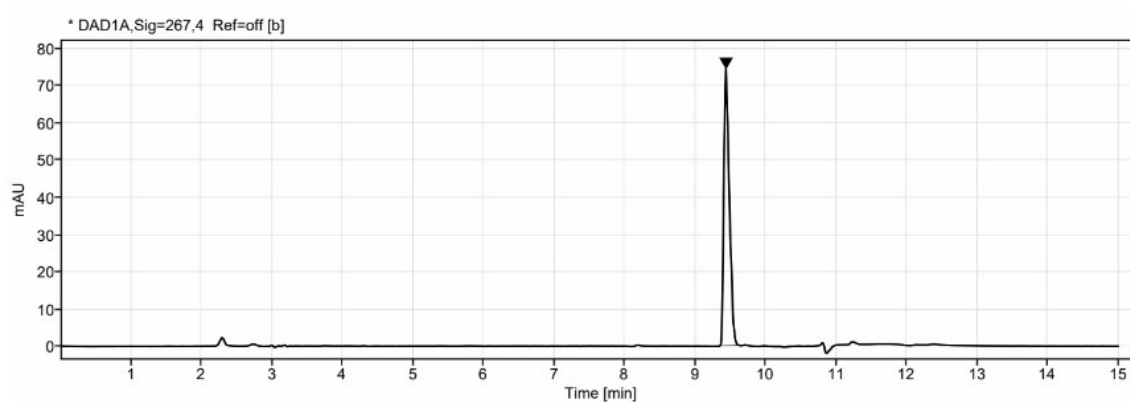

**Fig. S2(a)** HPLC chromatogram of TPP with detection wavelength at 267 nm and retention time of 9.4 min and run time of 15 min

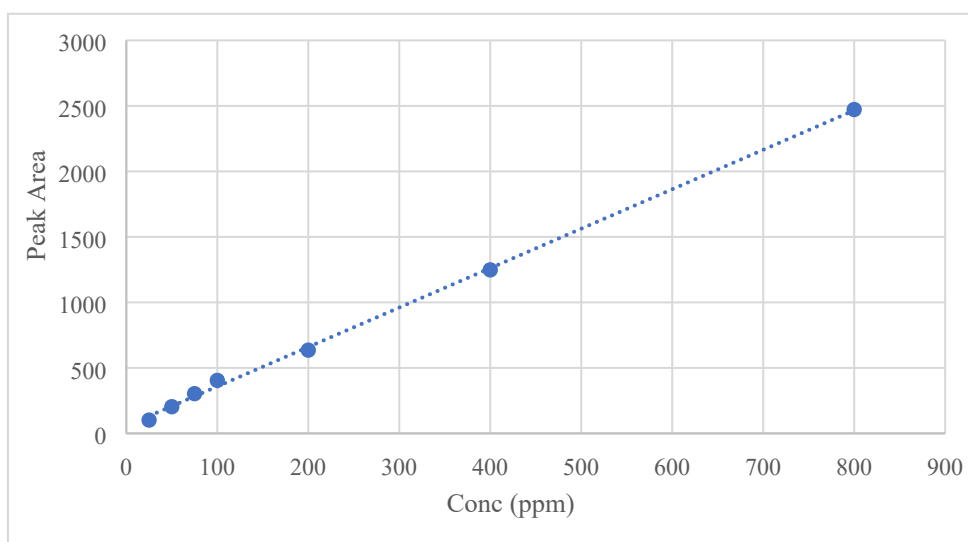

**Fig. S2(b)** Calibration curve and regression equation of TPP with linearity ranging from 25 ppm to 800 ppm and  $R^2$  value of 0.999

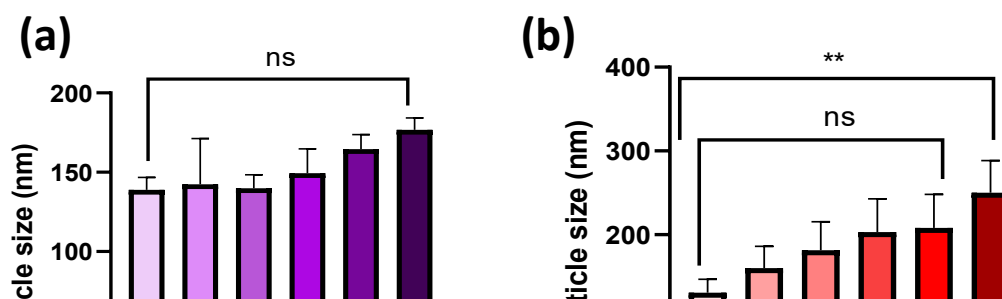

**Fig. S3** Stability data of TMZ-loaded CSNPs (a) Particle size stored at  $4\pm 1^\circ\text{C}$ ; no statistically significant difference (ns) between day 0 and day 28 at  $p=0.0786$  (b) Particle size stored at  $25\pm 1^\circ\text{C}$ ; statistically significant difference ( $**p<0.01$ ;  $p=0.0091$ ) between day 0 and day 28 (c) PDI stored at  $4\pm 1^\circ\text{C}$ ; no statistically significant difference (ns) between day 0 and day 28 at  $p=0.0672$  (d) PDI stored at  $25\pm 1^\circ\text{C}$ ; statistically significant difference ( $**p<0.01$ ;  $p=0.0033$ ) between day 0 and day 28 (e) Zeta potential stored at  $4\pm 1^\circ\text{C}$ ; no statistically significant difference (ns) between day 0 and day 28 at  $p=0.4274$  (f) Zeta potential stored at  $25\pm 1^\circ\text{C}$ ; statistically significant difference ( $*p<0.05$ ;  $p=0.0101$ ) between day 0 and day 28 (Data

represented as mean  $\pm$  S.D., n=3, multigroup analysis was made by Ordinary one Way-ANOVA (Parametric test) followed by Tukey's post hoc test; \*p<0.05, \*\*p<0.01, ns-no statistical significant difference)

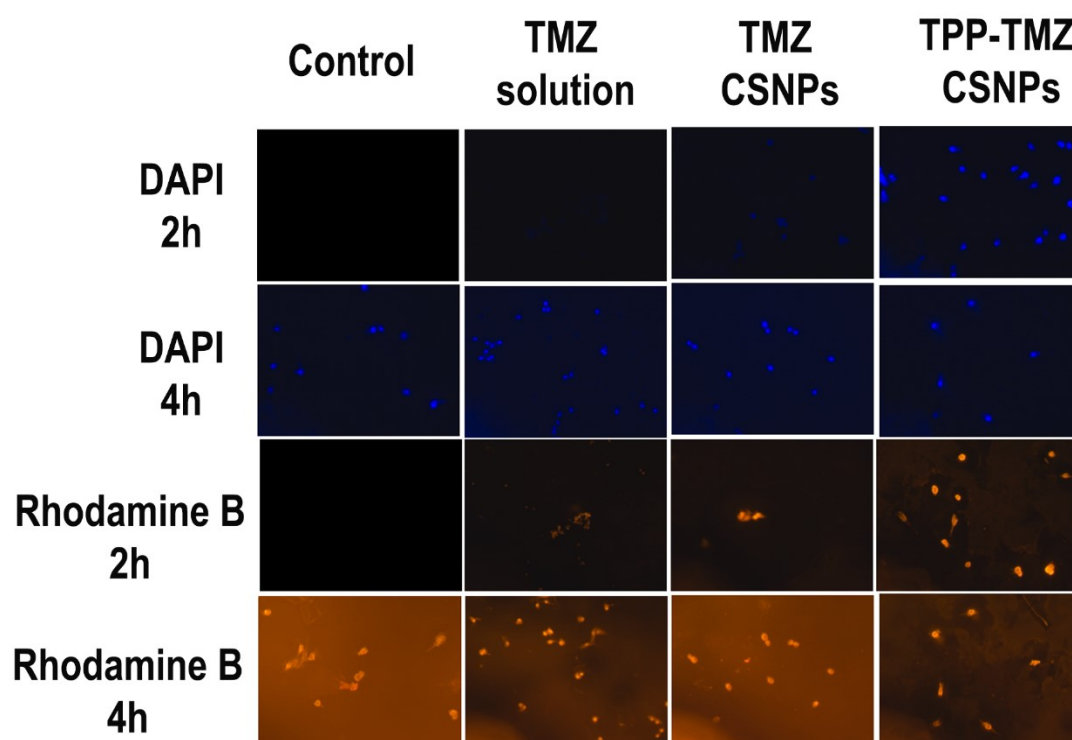

**Fig. S4:** Cellular uptake images with rhodamine B staining and DAPI as counterstain (Nuclei staining) at 2h and 4h of formulation treatment, viz., control (without treatment, TMZ solution, TMZ-loaded CSNPs and TPP-conjugated TMZ-loaded CSNPs) confirming greater cellular uptake by U87 cells for conjugated NPs than TMZ solution

## Supplementary Tables

| QTPP                       | Target                                     | Justification                                                                                                                                                                                                                                                                                                               |
|----------------------------|--------------------------------------------|-----------------------------------------------------------------------------------------------------------------------------------------------------------------------------------------------------------------------------------------------------------------------------------------------------------------------------|
| Administration Route       | Intranasal                                 | It allows the fast drug passage directly to the brain, avoiding the need <del>of crossing to cross</del> the BBB.                                                                                                                                                                                                           |
| Clinical use               | Glioblastoma treatment                     | Temozolomide is the first-line agent for treating GBM, by alkylation of adenine/guanine residues, leading to DNA damage through futile repair cycles and eventual cell death of cancerous cells.                                                                                                                            |
| Drug Delivery system       | TPP <sup>+</sup> -Conjugated Nanoparticles | Conjugated nanoparticles selectively target the mitochondria of cancerous cells by differentiating the mitochondrial potential of cancerous cells and -have sizes < 200 nm, and polydispersity index of less than 0.25 (homogeneity) promoting the direct passage to the brain through the trigeminal and olfactory nerves. |
| Pharmaceutical Dosage Form | Aqueous Dispersion                         | Facilitates nasal application through a spray device.                                                                                                                                                                                                                                                                       |

**Table S1: Quality target profile (QTPP) of TPP<sup>+</sup>-conjugated TMZ-loaded CSNPs**

| Factor           | DOF | Sum of squares | F ratio | P value |
|------------------|-----|----------------|---------|---------|
| TMZ Conc         | 1   | 4.945E+06      | 19.60   | 0.0068  |
| Stirring speed-2 | 1   | 3.017E+06      | 11.96   | 0.0181  |
| Residual         | 5   | 1.261E+06      | -       | -       |
|                  |     |                |         |         |
| Cor total        | 7   | 9.223E+06      | -       | -       |

**Table S21(a)** ANOVA analysis of particle size in Taguchi design

**Table S21(b)** ANOVA analysis of PDI in Taguchi design

| Source             | Sum of Squares | df | Mean Square | F-value | p-value |             |
|--------------------|----------------|----|-------------|---------|---------|-------------|
| Model              | 7.34           | 3  | 2.45        | 16.25   | 0.0105  | significant |
| A-Chitosan conc    | 2.71           | 1  | 2.71        | 17.99   | 0.0133  |             |
| F-Stirring speed-2 | 1.60           | 1  | 1.60        | 10.60   | 0.0312  |             |
| G-Time-2           | 3.03           | 1  | 3.03        | 20.15   | 0.0109  |             |
| Residual           | 0.6020         | 4  | 0.1505      |         |         |             |
| Cor Total          | 7.94           | 7  |             |         |         |             |

**c) ANOVA analysis of % entrapment efficiency in Taguchi design**

**Table  
S21(**

| Source     | Sum of Squares | df | Mean Square | F-value | p-value |             |
|------------|----------------|----|-------------|---------|---------|-------------|
| Model      | 0.2713         | 1  | 0.2713      | 8.52    | 0.0267  | significant |
|            |                |    |             |         |         |             |
| B-TMZ conc | 0.2713         | 1  | 0.2713      | 8.52    | 0.0267  |             |
| Residual   | 0.1911         | 6  | 0.0318      |         |         |             |
| Cor Total  | 0.4624         | 7  |             |         |         |             |

**Table S32(a)** ANOVA Table of particle size in BBD

| Source             | Sum of Squares | df | Mean Square | F-value | p-value |                 |
|--------------------|----------------|----|-------------|---------|---------|-----------------|
| Model              | 59658.75       | 4  | 14914.69    | 3.01    | 0.0401  | significant     |
| A-Chitosan conc    | 21204.67       | 1  | 21204.67    | 4.28    | 0.0505  |                 |
| B-TMZ Conc         | 1845.39        | 1  | 1845.39     | 0.3727  | 0.5478  |                 |
| C-Stirring Speed-2 | 2278.28        | 1  | 2278.28     | 0.4601  | 0.5047  |                 |
| D-Time-2           | 37139.20       | 1  | 37139.20    | 7.50    | 0.0120  |                 |
| Residual           | 1.089E+05      | 22 | 4951.94     |         |         |                 |
| Lack of Fit        | 59210.05       | 19 | 3116.32     | 0.1880  | 0.9922  | not significant |
| Pure Error         | 49732.67       | 3  | 16577.56    |         |         |                 |

|           |           |    |  |  |  |  |
|-----------|-----------|----|--|--|--|--|
| Cor Total | 1.686E+05 | 26 |  |  |  |  |
|-----------|-----------|----|--|--|--|--|

**Table S32(b)** ANOVA Table of PDI in BBD

| Source             | Sum of Squares | df | Mean Square | F-value | p-value |                 |
|--------------------|----------------|----|-------------|---------|---------|-----------------|
| Model              | 0.2632         | 8  | 0.0329      | 6.35    | 0.0006  | significant     |
| A-Chitosan conc    | 0.0113         | 1  | 0.0113      | 2.19    | 0.1564  |                 |
| B-TMZ Conc         | 0.0017         | 1  | 0.0017      | 0.3209  | 0.5780  |                 |
| C-Stirring Speed-2 | 0.0644         | 1  | 0.0644      | 12.43   | 0.0024  |                 |
| D-Time-2           | 0.0009         | 1  | 0.0009      | 0.1829  | 0.6740  |                 |
| AB                 | 0.0682         | 1  | 0.0682      | 13.17   | 0.0019  |                 |
| AC                 | 0.0227         | 1  | 0.0227      | 4.38    | 0.0508  |                 |
| C <sup>2</sup>     | 0.1182         | 1  | 0.1182      | 22.81   | 0.0002  |                 |
| D <sup>2</sup>     | 0.0228         | 1  | 0.0228      | 4.39    | 0.0505  |                 |
| Residual           | 0.0932         | 18 | 0.0052      |         |         |                 |
| Lack of Fit        | 0.0385         | 15 | 0.0026      | 0.1404  | 0.9966  | not significant |
| Pure Error         | 0.0548         | 3  | 0.0183      |         |         |                 |
| Cor Total          | 0.3565         | 26 |             |         |         |                 |

**Table S32(c)** ANOVA Table of % entrapment efficiency in BBD

| Source          | Sum of Squares | df | Mean Square | F-value | p-value |                 |
|-----------------|----------------|----|-------------|---------|---------|-----------------|
| Model           | 1483.15        | 5  | 296.63      | 5.43    | 0.0023  | significant     |
| A-Chitosan conc | 33.63          | 1  | 33.63       | 0.6157  | 0.4414  |                 |
| B-TMZ Conc      | 1.30           | 1  | 1.30        | 0.0237  | 0.8790  |                 |
| D-Time-2        | 141.71         | 1  | 141.71      | 2.59    | 0.1222  |                 |
| BD              | 423.75         | 1  | 423.75      | 7.76    | 0.0111  |                 |
| A <sup>2</sup>  | 882.31         | 1  | 882.31      | 16.15   | 0.0006  |                 |
| Residual        | 1146.96        | 21 | 54.62       |         |         |                 |
| Lack of Fit     | 1094.74        | 18 | 60.82       | 3.49    | 0.1653  | not significant |
| Pure Error      | 52.23          | 3  | 17.41       |         |         |                 |
| Cor Total       | 2630.12        | 26 |             |         |         |                 |

**Table S4: Linearity range and respective peak area of TPP solution**

| <u>Sr. No.</u> | <u>Concentration (ppm)</u> | <u>Peak Area</u> |
|----------------|----------------------------|------------------|
| <u>1</u>       | <u>25</u>                  | <u>101.639</u>   |
| <u>2</u>       | <u>50</u>                  | <u>203.772</u>   |
| <u>3</u>       | <u>75</u>                  | <u>303.238</u>   |
| <u>4</u>       | <u>100</u>                 | <u>404.502</u>   |
| <u>5</u>       | <u>200</u>                 | <u>635.424</u>   |
| <u>6</u>       | <u>400</u>                 | <u>1248.345</u>  |
| <u>7</u>       | <u>800</u>                 | <u>2472.301</u>  |
